# Supplementary material for: Patient safety work in Sweden: quantitative and qualitative analysis of annual patient safety reports
Source: Springer Nature journal article supplement (doi:10.1186/s12913-016-1350-5), 2016-03-21
Supplement: MOESM1 [file 9758260]

Additional file 1 – The National Financial Incentive Plan for Patient Safety 2011- 2014

| <b>The National Financial Incentive Plan for Patient Safety</b> - translated by the authors (MR, PN)<br>Available 2015-08-20 [in Swedish]: <a href="http://skl.se/download/18.99cec5e1477430727ca1c75/1408107042312/SKL-fran-styrelsen2013-09+SB+Patients%C3%A4kerhet.pdf">http://skl.se/download/18.99cec5e1477430727ca1c75/1408107042312/SKL-fran-styrelsen2013-09+SB+Patients%C3%A4kerhet.pdf</a> |                                                                                                           |                                                                                                                                               |                                                                                                                                                                    |
|------------------------------------------------------------------------------------------------------------------------------------------------------------------------------------------------------------------------------------------------------------------------------------------------------------------------------------------------------------------------------------------------------|-----------------------------------------------------------------------------------------------------------|-----------------------------------------------------------------------------------------------------------------------------------------------|--------------------------------------------------------------------------------------------------------------------------------------------------------------------|
| <b>2011</b>                                                                                                                                                                                                                                                                                                                                                                                          | <b>2012</b>                                                                                               | <b>2013</b>                                                                                                                                   | <b>2014</b>                                                                                                                                                        |
| Assemble an annual patient safety report (*)                                                                                                                                                                                                                                                                                                                                                         | Assemble an annual patient safety report (*)                                                              | Assemble an annual patient safety report (*)                                                                                                  | Assemble an annual patient safety report (*)                                                                                                                       |
| Form a local STRAMA group<br><br>Work for increased adherence to local treatment recommendations, and reduce antibiotic prescribing (**)                                                                                                                                                                                                                                                             | Work for increased adherence to local treatment recommendations, and reduce antibiotic prescribing (**)   | Work for increased adherence to local treatment recommendations, reduce antibiotic prescribing and provide overview of the prescriptions (**) | Work for increased adherence to local treatment recommendations, reduce antibiotic prescribing and provide overview and evaluate effects of the prescriptions (**) |
| Participate in the national patient survey in primary health care (*)                                                                                                                                                                                                                                                                                                                                | Reach average results regarding measures of patient-perceived quality in the national patient survey (**) | Participate in the national patient survey in primary health care (*)                                                                         | Participate in the national patient survey in primary and hospital health care (*)                                                                                 |
| Make essential steps in implementation of National Patient Overview (NPO) (*)                                                                                                                                                                                                                                                                                                                        | Continue working with NPO and demonstrate wide spread use (*)                                             | Continue working with NPO and demonstrate wider use in comparison with previous year                                                          | Continue working with NPO and demonstrate wider use in comparison with previous year                                                                               |
| Measure the patient safety culture (**)                                                                                                                                                                                                                                                                                                                                                              | Make action plans and initiate improvement projects on patient safety culture (**)                        | Pursue and evaluate improvement projects on patient safety culture and update action plans (*)                                                | Repeat survey of patient safety culture, evaluate improvement projects and update action plans (*)                                                                 |
| Measure compliance with hygiene rules and dressing rules (**)                                                                                                                                                                                                                                                                                                                                        | Measure compliance with hygiene rules and dressing rules and reach average compliance of 64 % (**)        | Measure compliance with hygiene rules and dressing rules and reach average compliance of 70 % (**)                                            | Measure compliance with hygiene rules and dressing rules, and reach average compliance of 72 % (**)                                                                |
| Measure prevalence of pressure ulcers (**)                                                                                                                                                                                                                                                                                                                                                           | Make action plans and initiate an improvement project regarding pressure ulcers (**)                      | Measure prevalence of pressure ulcers, update action plans and pursue the improvement project on pressure ulcers (**)                         | Measure prevalence of pressure ulcers, update action plans, pursue the improvement project and reach goals for recommended actions (**)                            |
|                                                                                                                                                                                                                                                                                                                                                                                                      | Initiate implementation of national electronic system to prevent and reduce health care-associated        | Make essential steps in implementation of the Infection Tool (**)                                                                             | Implement the Infection Tool in specified range and validate data quality (**)                                                                                     |

Additional file 1 – The National Financial Incentive Plan for Patient Safety 2011- 2014

|                                                                                                                |                                                                                 |                                                                                                                           |                                                                                             |
|----------------------------------------------------------------------------------------------------------------|---------------------------------------------------------------------------------|---------------------------------------------------------------------------------------------------------------------------|---------------------------------------------------------------------------------------------|
|                                                                                                                | infections and incorrect antibiotic prescriptions, the "Infection Tool" (*)     |                                                                                                                           |                                                                                             |
|                                                                                                                | Work systematic with retrospective medical records reviews at all hospitals (*) | Continue to work with and develop retrospective medical records reviews (*)                                               | Continue to work with and develop retrospective medical records reviews (*)                 |
|                                                                                                                | Measure patient overcrowding according to set definitions (**)                  | Measure patient overcrowding according to set definitions (**)                                                            | Measure patient overcrowding according to set definitions and establish an action plan (**) |
|                                                                                                                |                                                                                 | Establish routines and start an improvement project concerning information on medications at discharge from hospital (**) | Implement routines regarding medications at discharge and start monitoring compliance (**)  |
| (*) = basic (mandatory) requirements to be eligible for reimbursement<br>(**) = performance-based requirements |                                                                                 |                                                                                                                           |                                                                                             |
