# Supplementary material for: Patient safety work in Sweden: quantitative and qualitative analysis of annual patient safety reports
Source: Springer Nature journal article supplement (doi:10.1186/s12913-016-1350-5), 2016-03-21
Supplement: MOESM2 [file 9758260]

**Headings in Patient Safety Report Template 2014** – translated by the authors (MR, PN)  
<http://skl.se/halsasjukvard/patientsakerhet/systematisktpatientsakerhetsarbete/patientsakerhetsberattelse.988.html>

- Summary
- Overall goals and strategies
- Organisational responsibility for patient safety
- Structure for monitoring/evaluation of the patient safety work
- Follow-up through self-control
- How has the patient safety work been carried out and what measures have been taken for increased patient safety?
- Collaboration to prevent adverse events
- Risk analysis
- Health professionals' reporting responsibility
- Handling of complaints
- Compilation and analysis
- Collaboration with patients and families
- Results
- Overall objectives and strategies for the coming years
